# Supplementary material for: Impacts of Diverse Natural Products on Honey Bee Viral Loads and Health
Source: MDPI journal article supplement (doi:10.3390/app112210732), 2021-11-13
Supplement: s1 [file s1]

Archive with 1 entries (1 files):
- applsci-1445373-supplementary.pdf
